# Supplementary material for: Evaluation of Phytochemistry and Pharmacological Properties of Alnus nitida
Source: MDPI journal article supplement (doi:10.3390/molecules27144582), 2022-07-18
Supplement: s1 [file s1]

# Supplementary Materials

## Evaluation of Phytochemistry and Pharmacological Properties of *Alnus nitida*

**Table S1.** Effect of *A. nitida* leaves extract and its fractions on carrageenan induced paw edema in rats

| Treatment | Dose/route     | Before Injection | Increase in paw volume (ml) after carrageenan injection (mean $\pm$ SD)/ Percent inhibition of edema |                                                      |                                                      |                                                      |
|-----------|----------------|------------------|------------------------------------------------------------------------------------------------------|------------------------------------------------------|------------------------------------------------------|------------------------------------------------------|
|           |                |                  | +1 h                                                                                                 | +2 h                                                 | +3 h                                                 | +4 h                                                 |
| Saline    | 2 ml, i.p      | 1.14 $\pm$ 0.13  | 2.42 $\pm$ 0.27                                                                                      | 2.36 $\pm$ 0.48                                      | 1.98 $\pm$ 0.37                                      | 1.64 $\pm$ 0.28                                      |
| ANLM      | 50 mg/kg, p.o  | 1.09 $\pm$ 0.09  | 2.56 $\pm$ 0.11<br>(2.45 $\pm$ 0.92 <sup>e</sup> )                                                   | 2.07 $\pm$ 0.02<br>(34.24 $\pm$ 1.93 <sup>c</sup> )  | 1.91 $\pm$ 0.04<br>(48.66 $\pm$ 2.38 <sup>de</sup> ) | 1.36 $\pm$ 0.10<br>(61.81 $\pm$ 1.67 <sup>d</sup> )  |
|           | 100 mg/kg, p.o | 1.06 $\pm$ 0.09  | 2.52 $\pm$ 0.10<br>(2.62 $\pm$ 0.70 <sup>e</sup> )                                                   | 2.00 $\pm$ 0.07<br>(36.59 $\pm$ 3.44 <sup>b</sup> )  | 1.84 $\pm$ 0.05<br>(50.8 $\pm$ 3.83 <sup>d</sup> )   | 1.30 $\pm$ 0.08<br>(64.75 $\pm$ 3.04 <sup>c</sup> )  |
|           | 200 mg/kg, p.o | 1.04 $\pm$ 0.06  | 2.48 $\pm$ 0.05<br>(4.19 $\pm$ 1.24 <sup>bcd</sup> )                                                 | 1.94 $\pm$ 0.12<br>(39.82 $\pm$ 4.84 <sup>b</sup> )  | 1.65 $\pm$ 0.03<br>(61.47 $\pm$ 2.51 <sup>c</sup> )  | 1.13 $\pm$ 0.06<br>(87.23 $\pm$ 1.52 <sup>ab</sup> ) |
| ANLH      | 50 mg/kg, p.o  | 1.18 $\pm$ 0.05  | 2.65 $\pm$ 0.07<br>(1.88 $\pm$ 0.54 <sup>d</sup> )                                                   | 2.51 $\pm$ 0.05<br>(9.87 $\pm$ 1.78 <sup>f</sup> )   | 2.49 $\pm$ 0.03<br>(16.10 $\pm$ 1.64 <sup>g</sup> )  | 1.71 $\pm$ 0.03<br>(22.11 $\pm$ 2.05 <sup>g</sup> )  |
|           | 100 mg/kg, p.o | 1.12 $\pm$ 0.02  | 2.60 $\pm$ 0.02<br>(1.78 $\pm$ 0.26 <sup>de</sup> )                                                  | 2.44 $\pm$ 0.02<br>(11.34 $\pm$ 2.51 <sup>f</sup> )  | 2.41 $\pm$ 0.02<br>(16.20 $\pm$ 2.74 <sup>g</sup> )  | 1.63 $\pm$ 0.01<br>(25.47 $\pm$ 2.59 <sup>g</sup> )  |
|           | 200 mg/kg, p.o | 1.11 $\pm$ 0.05  | 2.59 $\pm$ 0.06<br>(1.68 $\pm$ 0.82 <sup>e</sup> )                                                   | 2.33 $\pm$ 0.09<br>(19.10 $\pm$ 2.03 <sup>ef</sup> ) | 2.31 $\pm$ 0.20<br>(27.44 $\pm$ 4.53 <sup>f</sup> )  | 1.43 $\pm$ 0.07<br>(56.01 $\pm$ 2.16 <sup>d</sup> )  |
| ANLC      | 50 mg/kg, p.o  | 1.13 $\pm$ 0.04  | 2.61 $\pm$ 0.07<br>(1.78 $\pm$ 0.40 <sup>e</sup> )                                                   | 2.19 $\pm$ 0.01<br>(29.44 $\pm$ 2.96 <sup>d</sup> )  | 1.81 $\pm$ 0.02<br>(57.48 $\pm$ 2.87 <sup>cd</sup> ) | 1.37 $\pm$ 0.04<br>(65.39 $\pm$ 2.89 <sup>cd</sup> ) |
|           | 100 mg/kg, p.o | 1.12 $\pm$ 0.08  | 2.58 $\pm$ 0.08<br>(2.84 $\pm$ 0.96 <sup>cd</sup> )                                                  | 2.12 $\pm$ 0.07<br>(33.36 $\pm$ 2.88 <sup>bc</sup> ) | 1.73 $\pm$ 0.09<br>(59.01 $\pm$ 3.52 <sup>c</sup> )  | 1.34 $\pm$ 0.08<br>(68.96 $\pm$ 3.38 <sup>c</sup> )  |
|           | 200 mg/kg, p.o | 1.08 $\pm$ 0.05  | 2.51 $\pm$ 0.06<br>(5.16 $\pm$ 1.82 <sup>bc</sup> )                                                  | 1.70 $\pm$ 0.03<br>(58.99 $\pm$ 3.51 <sup>a</sup> )  | 1.52 $\pm$ 0.06<br>(73.43 $\pm$ 2.45 <sup>b</sup> )  | 1.15 $\pm$ 0.05<br>(91.23 $\pm$ 2.80 <sup>a</sup> )  |
| ANLE      | 50 mg/kg, p.o  | 1.08 $\pm$ 0.08  | 2.56 $\pm$ 0.08<br>(2.07 $\pm$ 0.27 <sup>d</sup> )                                                   | 2.32 $\pm$ 0.01<br>(16.72 $\pm$ 2.06 <sup>f</sup> )  | 2.24 $\pm$ 0.06<br>(26.68 $\pm$ 2.92 <sup>f</sup> )  | 1.56 $\pm$ 0.06<br>(30.30 $\pm$ 3.33 <sup>f</sup> )  |

|                             |                   |           |                                          |                                           |                                          |                                          |
|-----------------------------|-------------------|-----------|------------------------------------------|-------------------------------------------|------------------------------------------|------------------------------------------|
|                             | 100 mg/kg,<br>p.o | 1.10±0.08 | 2.54±0.08<br>(4.10±1.32 <sup>bcd</sup> ) | 2.25±0.08<br>(22.50±2.16 <sup>de</sup> )  | 2.23±0.06<br>(28.07±2.74 <sup>ef</sup> ) | 1.54±0.08<br>(36.39±2.36 <sup>f</sup> )  |
|                             | 200 mg/kg,<br>p.o | 1.10±0.07 | 2.56±0.07<br>(3.32±1.15 <sup>bcd</sup> ) | 2.20±0.10<br>(26.12±2.91 <sup>cde</sup> ) | 2.18±0.05<br>(31.41±4.97 <sup>e</sup> )  | 1.48±0.07<br>(45.01±2.87 <sup>e</sup> )  |
| <b>ANLA</b>                 | 50 mg/kg, p.o     | 1.09±2.56 | 2.56±0.07<br>(1.97±0.51 <sup>e</sup> )   | 2.11±0.05<br>(31.99±3.06 <sup>c</sup> )   | 1.92±0.04<br>(47.83±2.85 <sup>e</sup> )  | 1.43±0.05<br>(51.31±3.88 <sup>cd</sup> ) |
|                             | 100 mg/kg,<br>p.o | 1.09±0.07 | 2.56±0.07<br>(2.07±0.47 <sup>de</sup> )  | 2.07±0.07<br>(34.53±2.26 <sup>bc</sup> )  | 1.87±0.06<br>(50.98±2.69 <sup>d</sup> )  | 1.34±0.08<br>(63.71±1.98 <sup>c</sup> )  |
|                             | 200 mg/kg,<br>p.o | 1.10±0.08 | 2.57±0.07<br>(2.36±0.64 <sup>de</sup> )  | 1.99±0.11<br>(40.70±1.93 <sup>b</sup> )   | 1.76±0.13<br>(58.68±3.23 <sup>c</sup> )  | 1.23±0.08<br>(81.56±3.60 <sup>b</sup> )  |
| <b>Diclofenac potassium</b> | 10 mg/kg,i.p      | 1.10±0.09 | 2.49±0.08<br>(8.15±1.73 <sup>a</sup> )   | 1.64±0.05<br>(64.63±3.82 <sup>a</sup> )   | 1.43±0.09<br>(79.97±2.47 <sup>a</sup> )  | 1.20±0.08<br>(86.63±3.42 <sup>ab</sup> ) |
| <b>Fluoxetine</b>           | 10 mg/kg,i.p      | 1.09±0.05 | 2.51±0.03<br>(5.54±1.74 <sup>b</sup> )   | 1.64±0.05<br>(63.50±2.68 <sup>a</sup> )   | 1.45±0.04<br>(77.70±2.62 <sup>ab</sup> ) | 1.20±0.06<br>(84.71±2.46 <sup>b</sup> )  |

ANLM; *A. nitida* leaves methanol extract, ANLH; *A. nitida* leaves n-hexane fraction, ANLC; *A. nitida*

leaves chloroform fraction, ANLE; *A. nitida* leaves ethyl acetate fraction, ANLA; *A. nitida* leaves aqueous

fraction. Values are presented as mean±SD (n=7). Means with different superscript <sup>(a-g)</sup> letters in column

are significantly (P < 0.01) different from each other. Percentage inhibition is shown in brackets. Inhibition

in saline treated group at each time point was calculated relative to paw edema after 1 h.

**Table S2.** Effect of *A. nitida* fruit extract and its fractions on Carrageenan induced paw edema in rats

| Treatment | Dose/route     | Before injection | Increase in paw volume (ml) after carrageenan injection<br>(mean $\pm$ SD)/ Percent inhibition of edema |                                                       |                                                      |                                                      |
|-----------|----------------|------------------|---------------------------------------------------------------------------------------------------------|-------------------------------------------------------|------------------------------------------------------|------------------------------------------------------|
|           |                |                  | +1 h                                                                                                    | +2 h                                                  | +3 h                                                 | +4 h                                                 |
| Saline    | 2 ml, i.p      | 1.14 $\pm$ 0.13  | 2.42 $\pm$ 0.27                                                                                         | 2.36 $\pm$ 0.48                                       | 1.98 $\pm$ 0.37                                      | 1.64 $\pm$ 0.28                                      |
| ANFM      | 50 mg/kg, p.o  | 1.06 $\pm$ 0.09  | 2.53 $\pm$ 0.10<br>(2.18 $\pm$ 0.20 <sup>f</sup> )                                                      | 2.04 $\pm$ 0.08<br>(34.34 $\pm$ 1.93 <sup>d</sup> )   | 1.90 $\pm$ 0.05<br>(46.72 $\pm$ 1.79 <sup>e</sup> )  | 1.36 $\pm$ 0.09<br>(55.51 $\pm$ 2.64 <sup>de</sup> ) |
|           | 100 mg/kg, p.o | 1.06 $\pm$ 0.10  | 2.52 $\pm$ 0.10<br>(2.36 $\pm$ 0.93 <sup>e</sup> )                                                      | 2.00 $\pm$ 0.08<br>(36.88 $\pm$ 3.39 <sup>cde</sup> ) | 1.85 $\pm$ 0.05<br>(49.96 $\pm$ 3.24 <sup>d</sup> )  | 1.34 $\pm$ 0.11<br>(58.87 $\pm$ 3.38 <sup>d</sup> )  |
|           | 200 mg/kg, p.o | 1.04 $\pm$ 0.06  | 2.48 $\pm$ 0.06<br>(3.71 $\pm$ 0.74 <sup>cde</sup> )                                                    | 1.96 $\pm$ 0.06<br>(38.45 $\pm$ 2.71 <sup>cd</sup> )  | 1.67 $\pm$ 0.04<br>(60.17 $\pm$ 2.81 <sup>c</sup> )  | 1.19 $\pm$ 0.05<br>(78.41 $\pm$ 3.92 <sup>e</sup> )  |
| ANFH      | 50 mg/kg, p.o  | 1.10 $\pm$ 0.08  | 2.58 $\pm$ 0.08<br>(2.94 $\pm$ 0.82 <sup>e</sup> )                                                      | 2.30 $\pm$ 0.08<br>(19.66 $\pm$ 1.18 <sup>g</sup> )   | 2.29 $\pm$ 0.08<br>(23.90 $\pm$ 2.18 <sup>g</sup> )  | 1.58 $\pm$ 0.07<br>(30.72 $\pm$ 1.67 <sup>f</sup> )  |
|           | 100 mg/kg, p.o | 1.10 $\pm$ 0.08  | 2.56 $\pm$ 0.08<br>(3.13 $\pm$ 0.77 <sup>de</sup> )                                                     | 2.27 $\pm$ 0.07<br>(21.62 $\pm$ 1.89 <sup>fg</sup> )  | 2.27 $\pm$ 0.07<br>(25.94 $\pm$ 2.08 <sup>f</sup> )  | 1.56 $\pm$ 0.07<br>(33.45 $\pm$ 2.65 <sup>f</sup> )  |
|           | 200 mg/kg, p.o | 1.11 $\pm$ 0.07  | 2.56 $\pm$ 0.07<br>(3.52 $\pm$ 1.29 <sup>cde</sup> )                                                    | 2.20 $\pm$ 0.10<br>(26.31 $\pm$ 2.67 <sup>f</sup> )   | 2.16 $\pm$ 0.05<br>(32.99 $\pm$ 3.77 <sup>e</sup> )  | 1.45 $\pm$ 0.06<br>(50.26 $\pm$ 2.36 <sup>e</sup> )  |
| ANFC      | 50 mg/kg, p.o  | 1.12 $\pm$ 0.08  | 2.59 $\pm$ 0.08<br>(2.46 $\pm$ 0.94 <sup>ef</sup> )                                                     | 2.17 $\pm$ 0.07<br>(29.74 $\pm$ 1.10 <sup>ef</sup> )  | 1.83 $\pm$ 0.07<br>(55.71 $\pm$ 3.16 <sup>d</sup> )  | 1.40 $\pm$ 0.08<br>(59.50 $\pm$ 3.29 <sup>e</sup> )  |
|           | 100 mg/kg, p.o | 1.12 $\pm$ 0.08  | 2.58 $\pm$ 0.08<br>(2.74 $\pm$ 0.91 <sup>e</sup> )                                                      | 2.12 $\pm$ 0.08<br>(32.77 $\pm$ 2.30 <sup>e</sup> )   | 1.79 $\pm$ 0.08<br>(59.01 $\pm$ 3.52 <sup>c</sup> )  | 1.37 $\pm$ 0.07<br>(63.92 $\pm$ 2.55 <sup>d</sup> )  |
|           | 200 mg/kg, p.o | 1.10 $\pm$ 0.05  | 2.51 $\pm$ 0.06<br>(6.51 $\pm$ 0.94 <sup>ab</sup> )                                                     | 1.71 $\pm$ 0.03<br>(59.97 $\pm$ 2.59 <sup>b</sup> )   | 1.53 $\pm$ 0.06<br>(73.71 $\pm$ 1.27 <sup>b</sup> )  | 1.19 $\pm$ 0.06<br>(87.86 $\pm$ 2.78 <sup>a</sup> )  |
| ANFE      | 50 mg/kg, p.o  | 1.13 $\pm$ 0.02  | 2.60 $\pm$ 0.02<br>(1.68 $\pm$ 0.70 <sup>f</sup> )                                                      | 2.44 $\pm$ 0.03<br>(11.73 $\pm$ 1.41 <sup>h</sup> )   | 2.40 $\pm$ 0.02<br>(19.07 $\pm$ 0.49 <sup>f</sup> )  | 1.59 $\pm$ 0.03<br>(31.98 $\pm$ 2.16 <sup>f</sup> )  |
|           | 100 mg/kg, p.o | 1.13 $\pm$ 0.05  | 2.60 $\pm$ 0.02<br>(2.07 $\pm$ 0.85 <sup>e</sup> )                                                      | 2.42 $\pm$ 0.03<br>(12.81 $\pm$ 1.53 <sup>h</sup> )   | 2.38 $\pm$ 0.05<br>(20.37 $\pm$ 1.63 <sup>f</sup> )  | 1.58 $\pm$ 0.03<br>(33.45 $\pm$ 2.46 <sup>f</sup> )  |
|           | 200 mg/kg, p.o | 1.11 $\pm$ 0.05  | 2.59 $\pm$ 0.06<br>(1.88 $\pm$ 0.85 <sup>e</sup> )                                                      | 2.29 $\pm$ 0.09<br>(21.84 $\pm$ 2.29 <sup>g</sup> )   | 2.31 $\pm$ 0.26<br>(27.60 $\pm$ 4.87 <sup>f</sup> )  | 1.48 $\pm$ 0.08<br>(49.03 $\pm$ 2.01 <sup>e</sup> )  |
| ANFA      | 50 mg/kg, p.o  | 1.09 $\pm$ 0.07  | 2.57 $\pm$ 0.07<br>(1.88 $\pm$ 0.66 <sup>f</sup> )                                                      | 2.10 $\pm$ 0.06<br>(32.18 $\pm$ 1.79 <sup>e</sup> )   | 1.91 $\pm$ 0.07<br>(48.76 $\pm$ 1.79 <sup>de</sup> ) | 1.39 $\pm$ 0.06<br>(56.98 $\pm$ 2.36 <sup>e</sup> )  |

|                                      |                   |           |                                          |                                          |                                          |                                          |
|--------------------------------------|-------------------|-----------|------------------------------------------|------------------------------------------|------------------------------------------|------------------------------------------|
|                                      | 100 mg/kg,<br>p.o | 1.09±0.07 | 2.56±0.07<br>(2.07±0.47 <sup>e</sup> )   | 2.07±0.07<br>(34.24±2.11 <sup>de</sup> ) | 1.88±0.09<br>(50.15±1.47 <sup>d</sup> )  | 1.36±0.08<br>(60.76±2.31 <sup>d</sup> )  |
|                                      | 200 mg/kg,<br>p.o | 1.10±0.08 | 2.53±0.08<br>(4.96±1.06 <sup>bcd</sup> ) | 1.98±0.10<br>(41.58±1.18 <sup>c</sup> )  | 1.72±0.10<br>(61.47±4.68 <sup>c</sup> )  | 1.24±0.07<br>(80.93±3.38 <sup>bc</sup> ) |
| <b>Diclofena<br/>c<br/>potassium</b> | 10 mg/kg,i.p      | 1.10±0.09 | 2.49±0.08<br>(8.15±1.73 <sup>a</sup> )   | 1.64±0.05<br>(64.63±3.82 <sup>a</sup> )  | 1.43±0.09<br>(79.97±2.47 <sup>a</sup> )  | 1.20±0.08<br>(86.63±3.42 <sup>a</sup> )  |
| <b>Fluoxetine</b>                    | 10 mg/kg,i.p      | 1.09±0.05 | 2.51±0.03<br>(5.54±1.74 <sup>bc</sup> )  | 1.64±0.05<br>(63.50±2.68 <sup>ab</sup> ) | 1.45±0.04<br>(77.70±2.62 <sup>ab</sup> ) | 1.20±0.06<br>(84.71±2.46 <sup>ab</sup> ) |

ANFM; *A. nitida* fruit methanol extract, ANFH; *A. nitida* fruit n-hexane fraction, ANFC; *A. nitida* fruit chloroform fraction, ANFE; *A. nitida* fruit ethyl acetate fraction, ANFA; *A. nitida* fruit aqueous fraction.

Values are presented as mean±SD (n=7). Means with different superscript (a-d) letters in column are significantly (P < 0.01) different from each other. Percentage inhibition is shown in brackets. Inhibition in saline treated group at each time point was calculated relative to paw edema after 1 h.

**Table S3.** Effect of *A. nitida* leaves extract and its fractions on Freund's complete adjuvant induced arthritis

| Treatment | Dose/route        | Increase in paw volume (ml) after carrageenan injection (mean $\pm$ SD)/<br>Percent inhibition of edema |                                                       |                                                      |                                                      |
|-----------|-------------------|---------------------------------------------------------------------------------------------------------|-------------------------------------------------------|------------------------------------------------------|------------------------------------------------------|
|           |                   | 0 day                                                                                                   | +7 day                                                | +14 day                                              | +21 day                                              |
| Saline    | 2 ml, i.p         | 1.15 $\pm$ 0.02                                                                                         | 2.56 $\pm$ 0.02                                       | 2.62 $\pm$ 0.25                                      | 2.56 $\pm$ 0.02                                      |
| ANLM      | 50 mg/kg, p.o     | 1.14 $\pm$ 0.02                                                                                         | 2.31 $\pm$ 0.02<br>(9.76 $\pm$ 0.63 <sup>cde</sup> )  | 1.89 $\pm$ 0.01<br>(27.25 $\pm$ 0.46 <sup>e</sup> )  | 1.21 $\pm$ 0.07<br>(52.45 $\pm$ 2.78 <sup>d</sup> )  |
|           | 100 mg/kg,<br>p.o | 1.13 $\pm$ 0.03                                                                                         | 2.27 $\pm$ 0.06<br>(11.32 $\pm$ 2.31 <sup>bcd</sup> ) | 1.76 $\pm$ 0.04<br>(32.25 $\pm$ 1.66 <sup>d</sup> )  | 1.02 $\pm$ 0.05<br>(60.04 $\pm$ 1.89 <sup>e</sup> )  |
|           | 200 mg/kg,<br>p.o | 1.12 $\pm$ 0.02                                                                                         | 2.12 $\pm$ 0.06<br>(17.07 $\pm$ 2.56 <sup>a</sup> )   | 1.56 $\pm$ 0.07<br>(39.94 $\pm$ 2.78 <sup>c</sup> )  | 0.89 $\pm$ 0.06<br>(65.12 $\pm$ 2.47 <sup>bc</sup> ) |
| ANLH      | 50 mg/kg, p.o     | 1.15 $\pm$ 0.04                                                                                         | 2.45 $\pm$ 0.04<br>(4.12 $\pm$ 1.85 <sup>g</sup> )    | 2.04 $\pm$ 0.03<br>(21.37 $\pm$ 1.27 <sup>f</sup> )  | 1.83 $\pm$ 0.04<br>(28.23 $\pm$ 1.72 <sup>e</sup> )  |
|           | 100 mg/kg,<br>p.o | 1.13 $\pm$ 0.01                                                                                         | 2.41 $\pm$ 0.03<br>(5.69 $\pm$ 1.00 <sup>fg</sup> )   | 1.99 $\pm$ 0.03<br>(23.35 $\pm$ 1.21 <sup>f</sup> )  | 1.78 $\pm$ 0.02<br>(30.35 $\pm$ 0.80 <sup>e</sup> )  |
|           | 200 mg/kg,<br>p.o | 1.11 $\pm$ 0.01                                                                                         | 2.36 $\pm$ 0.06<br>(7.47 $\pm$ 2.26 <sup>efg</sup> )  | 1.89 $\pm$ 0.05<br>(27.25 $\pm$ 2.22 <sup>e</sup> )  | 1.67 $\pm$ 0.03<br>(34.59 $\pm$ 1.25 <sup>e</sup> )  |
| ANLC      | 50 mg/kg, p.o     | 1.09 $\pm$ 0.01                                                                                         | 2.33 $\pm$ 0.03<br>(8.98 $\pm$ 1.54 <sup>def</sup> )  | 1.39 $\pm$ 0.04<br>(46.53 $\pm$ 1.64 <sup>b</sup> )  | 0.91 $\pm$ 0.12<br>(64.34 $\pm$ 5.03 <sup>bc</sup> ) |
|           | 100 mg/kg,<br>p.o | 1.04 $\pm$ 0.02                                                                                         | 2.31 $\pm$ 0.02<br>(9.70 $\pm$ 0.91 <sup>cde</sup> )  | 1.32 $\pm$ 0.03<br>(49.12 $\pm$ 1.48 <sup>b</sup> )  | 0.80 $\pm$ 0.08<br>(68.69 $\pm$ 3.19 <sup>b</sup> )  |
|           | 200 mg/kg,<br>p.o | 1.02 $\pm$ 0.02                                                                                         | 2.23 $\pm$ 0.07<br>(12.89 $\pm$ 2.95 <sup>bc</sup> )  | 1.22 $\pm$ 0.06<br>(52.96 $\pm$ 2.14 <sup>a</sup> )  | 0.62 $\pm$ 0.01<br>(75.44 $\pm$ 6.65 <sup>a</sup> )  |
| ANLE      | 50 mg/kg, p.o     | 1.11 $\pm$ 0.01                                                                                         | 2.41 $\pm$ 0.02<br>(5.85 $\pm$ 0.63 <sup>f</sup> )    | 1.99 $\pm$ 0.02<br>(23.30 $\pm$ 0.69 <sup>d</sup> )  | 1.78 $\pm$ 0.01<br>(30.46 $\pm$ 0.31 <sup>e</sup> )  |
|           | 100 mg/kg,<br>p.o | 1.12 $\pm$ 0.02                                                                                         | 2.37 $\pm$ 0.02<br>(7.42 $\pm$ 0.63 <sup>fg</sup> )   | 1.84 $\pm$ 0.04<br>(29.23 $\pm$ 1.67 <sup>cd</sup> ) | 1.72 $\pm$ 0.03<br>(32.81 $\pm$ 1.27 <sup>e</sup> )  |
|           | 200 mg/kg,<br>p.o | 1.10 $\pm$ 0.01                                                                                         | 2.26 $\pm$ 0.02<br>(11.71 $\pm$ 0.63 <sup>c</sup> )   | 1.72 $\pm$ 0.03<br>(33.62 $\pm$ 1.38 <sup>b</sup> )  | 1.53 $\pm$ 0.06<br>(40.23 $\pm$ 2.65 <sup>b</sup> )  |
| ANLA      | 50 mg/kg, p.o     | 1.21 $\pm$ 0.01                                                                                         | 2.39 $\pm$ 0.03                                       | 1.93 $\pm$ 0.03                                      | 1.72 $\pm$ 0.02                                      |

|                                 |                   |           |                                          |                                          |                                         |
|---------------------------------|-------------------|-----------|------------------------------------------|------------------------------------------|-----------------------------------------|
|                                 |                   |           | (6.41±1.14 <sup>s</sup> )                | (25.71±1.20 <sup>cd</sup> )              | (32.58±0.80 <sup>e</sup> )              |
|                                 | 100 mg/kg,<br>p.o | 1.14±0.02 | 2.31±0.05<br>(9.59±2.04 <sup>de</sup> )  | 1.79±0.01<br>(31.15±0.31 <sup>bc</sup> ) | 1.68±0.11<br>(34.31±4.45 <sup>e</sup> ) |
|                                 | 200 mg/kg,<br>p.o | 1.09±0.01 | 2.21±0.04<br>(13.61±1.69 <sup>b</sup> )  | 1.67±0.02<br>(35.71±0.84 <sup>b</sup> )  | 1.45±0.02<br>(43.35±1.14 <sup>b</sup> ) |
| <b>Diclofenac<br/>potassium</b> | 10 mg/kg,i.p      | 1.11±0.15 | 2.21±0.02<br>(13.56±0.86 <sup>ab</sup> ) | 1.23±0.03<br>(52.69±0.96 <sup>a</sup> )  | 0.62±0.02<br>(75.78±0.92 <sup>a</sup> ) |
| <b>Fluoxetine</b>               | 10 mg/kg,i.p      | 1.13±0.03 | 2.19±0.04<br>(15.22±1.21 <sup>a</sup> )  | 1.22±0.01<br>(51.11±2.13 <sup>a</sup> )  | 0.59±0.07<br>(74.32±2.31 <sup>a</sup> ) |

ANLM; *A. nitida* leaves methanol extract, ANLH; *A. nitida* leaves n-hexane fraction, ANLC; *A. nitida* leaves chloroform fraction, ANLE; *A. nitida* leaves ethyl acetate fraction, ANLA; *A. nitida* leaves aqueous fraction. Values are presented as mean±SD (n=7). Means with different superscript <sup>(a-g)</sup> letters in column are significantly (P < 0.01) different from each other. Percentage inhibition is shown in brackets.

**Table S4.** Effect of *A. nitida* fruit and its fractions on Freund's complete adjuvant induced arthritis

| Treatment | Dose/route     | Increase in paw volume (ml) after carrageenan injection (mean $\pm$ SD)/<br>Percent inhibition of edema |                                                      |                                                      |                                                      |
|-----------|----------------|---------------------------------------------------------------------------------------------------------|------------------------------------------------------|------------------------------------------------------|------------------------------------------------------|
|           |                | 0 day                                                                                                   | +7 day                                               | +14 day                                              | +21 day                                              |
| Saline    | 2 ml, i.p      | 1.15 $\pm$ 0.02                                                                                         | 2.56 $\pm$ 0.02                                      | 2.62 $\pm$ 0.25                                      | 2.56 $\pm$ 0.02                                      |
| ANFM      | 50 mg/kg, p.o  | 1.14 $\pm$ 0.02                                                                                         | 2.39 $\pm$ 0.03<br>(6.42 $\pm$ 1.14 <sup>g</sup> )   | 1.93 $\pm$ 0.03<br>(24.71 $\pm$ 1.20 <sup>cd</sup> ) | 1.72 $\pm$ 0.02<br>(32.58 $\pm$ 0.80 <sup>e</sup> )  |
|           | 100 mg/kg, p.o | 1.13 $\pm$ 0.03                                                                                         | 2.31 $\pm$ 0.05<br>(9.59 $\pm$ 2.04 <sup>de</sup> )  | 1.79 $\pm$ 0.01<br>(31.15 $\pm$ 0.31 <sup>bc</sup> ) | 1.68 $\pm$ 0.11<br>(34.31 $\pm$ 4.45 <sup>e</sup> )  |
|           | 200 mg/kg, p.o | 1.12 $\pm$ 0.02                                                                                         | 2.21 $\pm$ 0.04<br>(13.61 $\pm$ 1.69 <sup>b</sup> )  | 1.66 $\pm$ 0.02<br>(36.71 $\pm$ 0.84 <sup>b</sup> )  | 1.43 $\pm$ 0.02<br>(44.35 $\pm$ 1.14 <sup>b</sup> )  |
| ANFH      | 50 mg/kg, p.o  | 1.15 $\pm$ 0.04                                                                                         | 2.41 $\pm$ 0.04<br>(4.52 $\pm$ 1.85 <sup>g</sup> )   | 2.04 $\pm$ 0.03<br>(21.37 $\pm$ 1.27 <sup>f</sup> )  | 1.89 $\pm$ 0.04<br>(25.23 $\pm$ 1.72 <sup>e</sup> )  |
|           | 100 mg/kg, p.o | 1.13 $\pm$ 0.01                                                                                         | 2.34 $\pm$ 0.03<br>(6.69 $\pm$ 1.00 <sup>fg</sup> )  | 1.99 $\pm$ 0.03<br>(23.35 $\pm$ 1.21 <sup>f</sup> )  | 2.18 $\pm$ 0.02<br>(26.35 $\pm$ 0.80 <sup>e</sup> )  |
|           | 200 mg/kg, p.o | 1.11 $\pm$ 0.01                                                                                         | 2.36 $\pm$ 0.06<br>(7.47 $\pm$ 2.26 <sup>efg</sup> ) | 1.89 $\pm$ 0.05<br>(27.25 $\pm$ 2.22 <sup>e</sup> )  | 2.29 $\pm$ 0.03<br>(31.59 $\pm$ 1.25 <sup>e</sup> )  |
| ANFC      | 50 mg/kg, p.o  | 1.09 $\pm$ 0.01                                                                                         | 2.35 $\pm$ 0.03<br>(7.98 $\pm$ 1.54 <sup>def</sup> ) | 1.39 $\pm$ 0.04<br>(46.53 $\pm$ 1.64 <sup>b</sup> )  | 1.21 $\pm$ 0.12<br>(60.34 $\pm$ 5.03 <sup>bc</sup> ) |
|           | 100 mg/kg, p.o | 1.04 $\pm$ 0.02                                                                                         | 2.31 $\pm$ 0.02<br>(9.70 $\pm$ 0.91 <sup>cde</sup> ) | 1.32 $\pm$ 0.03<br>(49.12 $\pm$ 1.48 <sup>b</sup> )  | 1.10 $\pm$ 0.08<br>(65.69 $\pm$ 3.19 <sup>b</sup> )  |
|           | 200 mg/kg, p.o | 1.02 $\pm$ 0.02                                                                                         | 2.14 $\pm$ 0.07<br>(15.89 $\pm$ 2.95 <sup>a</sup> )  | 1.22 $\pm$ 0.06<br>(52.96 $\pm$ 2.14 <sup>a</sup> )  | 0.98 $\pm$ 0.01<br>(70.44 $\pm$ 6.65 <sup>a</sup> )  |
| ANFE      | 50 mg/kg, p.o  | 1.11 $\pm$ 0.01                                                                                         | 2.40 $\pm$ 0.02<br>(6.85 $\pm$ 0.63 <sup>f</sup> )   | 1.99 $\pm$ 0.02<br>(23.30 $\pm$ 0.69 <sup>d</sup> )  | 1.98 $\pm$ 0.01<br>(28.46 $\pm$ 0.31 <sup>e</sup> )  |
|           | 100 mg/kg, p.o | 1.12 $\pm$ 0.02                                                                                         | 2.37 $\pm$ 0.02<br>(7.42 $\pm$ 0.63 <sup>fg</sup> )  | 1.88 $\pm$ 0.04<br>(29.23 $\pm$ 1.67 <sup>cd</sup> ) | 1.79 $\pm$ 0.03<br>(31.81 $\pm$ 1.27 <sup>c</sup> )  |
|           | 200 mg/kg, p.o | 1.10 $\pm$ 0.01                                                                                         | 2.26 $\pm$ 0.02<br>(11.71 $\pm$ 0.63 <sup>c</sup> )  | 1.76 $\pm$ 0.03<br>(31.62 $\pm$ 1.38 <sup>b</sup> )  | 1.73 $\pm$ 0.06<br>(39.23 $\pm$ 2.65 <sup>b</sup> )  |
| ANFA      | 50 mg/kg, p.o  | 1.21 $\pm$ 0.01                                                                                         | 2.31 $\pm$ 0.02<br>(9.76 $\pm$ 0.63 <sup>cde</sup> ) | 1.89 $\pm$ 0.01<br>(27.25 $\pm$ 0.46 <sup>e</sup> )  | 1.21 $\pm$ 0.07<br>(52.45 $\pm$ 2.78 <sup>d</sup> )  |

|                             |                |           |                                           |                                         |                                          |
|-----------------------------|----------------|-----------|-------------------------------------------|-----------------------------------------|------------------------------------------|
|                             | 100 mg/kg, p.o | 1.14±0.02 | 2.37±0.06<br>(10.32±2.31 <sup>bcd</sup> ) | 1.75±0.04<br>(33.25±1.66 <sup>d</sup> ) | 1.08±0.05<br>(59.04±1.89 <sup>c</sup> )  |
|                             | 200 mg/kg, p.o | 1.09±0.01 | 2.02±0.06<br>(18.07±2.56 <sup>a</sup> )   | 1.59±0.07<br>(38.94±1.78 <sup>c</sup> ) | 0.99±0.06<br>(63.12±2.47 <sup>bc</sup> ) |
| <b>Diclofenac potassium</b> | 10 mg/kg,i.p   | 1.11±0.15 | 2.21±0.02<br>(13.56±0.86 <sup>ab</sup> )  | 1.23±0.03<br>(52.69±0.96 <sup>a</sup> ) | 0.62±0.02<br>(75.78±0.92 <sup>a</sup> )  |
| <b>Fluoxetine</b>           | 10 mg/kg,i.p   | 1.13±0.03 | 2.19±0.04<br>(15.22±1.21 <sup>a</sup> )   | 1.22±0.01<br>(51.11±2.13 <sup>a</sup> ) | 0.59±0.07<br>(74.32±2.31 <sup>a</sup> )  |

ANFM; *A. nitida* fruit methanol extract, ANFH; *A. nitida* fruit n-hexane fraction, ANFC; *A. nitida* fruit chloroform fraction, ANFE; *A. nitida* fruit ethyl acetate fraction, ANFA; *A. nitida* fruit aqueous fraction. Values are presented as mean±SD (n=7). Means with different superscript <sup>(a-d)</sup> letters in column are significantly (P < 0.01) different from each other. Percentage inhibition is shown in brackets.



**Table S5.** Effect of *A. nitida* leaves and its fractions on histamine induced paw edema in rats

| Treatment        | Dose/route        | Increase in paw volume (ml) after histamine injection (mean $\pm$ SD)/ Percent inhibition of edema |                                                      |                                                       |                                                      |
|------------------|-------------------|----------------------------------------------------------------------------------------------------|------------------------------------------------------|-------------------------------------------------------|------------------------------------------------------|
|                  |                   | +1 h                                                                                               | +2 h                                                 | +3 h                                                  | +4 h                                                 |
| <b>Histamine</b> | 1 mg/ ml, i.p     | 0.27 $\pm$ 0.01                                                                                    | 0.248 $\pm$ 0.02                                     | 0.231 $\pm$ 0.03                                      | 0.23 $\pm$ 0.04                                      |
| <b>ANLM</b>      | 50 mg/kg,<br>p.o  | 0.26 $\pm$ 0.01<br>(3.70 $\pm$ 3.02 <sup>cd</sup> )                                                | 0.19 $\pm$ 0.01<br>(23.38 $\pm$ 5.20 <sup>c</sup> )  | 0.13 $\pm$ 0.01<br>(43.66 $\pm$ 0.52 <sup>d</sup> )   | 0.12 $\pm$ 0.08<br>(47.82 $\pm$ 3.54 <sup>e</sup> )  |
|                  | 100 mg/kg,<br>p.o | 0.25 $\pm$ 0.02<br>(7.40 $\pm$ 0.60 <sup>abc</sup> )                                               | 0.18 $\pm$ 0.02<br>(27.41 $\pm$ 1.06 <sup>c</sup> )  | 0.12 $\pm$ 0.01<br>(48.05 $\pm$ 7.06 <sup>cd</sup> )  | 0.11 $\pm$ 0.08<br>(52.17 $\pm$ 3.54 <sup>e</sup> )  |
|                  | 200 mg/kg,<br>p.o | 0.24 $\pm$ 0.01<br>(7.77 $\pm$ 0.30 <sup>abc</sup> )                                               | 0.17 $\pm$ 0.02<br>(31.45 $\pm$ 0.83 <sup>c</sup> )  | 0.11 $\pm$ 0.08<br>(52.38 $\pm$ 3.53 <sup>bc</sup> )  | 0.08 $\pm$ 0.01<br>(65.21 $\pm$ 5.61 <sup>b</sup> )  |
| <b>ANLH</b>      | 50 mg/kg,<br>p.o  | 0.26 $\pm$ 0.01<br>(0.21 $\pm$ 0.19 <sup>d</sup> )                                                 | 0.23 $\pm$ 0.01<br>(5.41 $\pm$ 1.31 <sup>d</sup> )   | 0.19 $\pm$ 0.001<br>(17.74 $\pm$ 0.35 <sup>f</sup> )  | 0.18 $\pm$ 0.01<br>(21.73 $\pm$ 0.66 <sup>e</sup> )  |
|                  | 100 mg/kg,<br>p.o | 0.26 $\pm$ 0.01<br>(3.70 $\pm$ 0.42 <sup>cd</sup> )                                                | 0.23 $\pm$ 0.01<br>(5.64 $\pm$ 0.23 <sup>d</sup> )   | 0.18 $\pm$ 0.044<br>(22.07 $\pm$ 1.76 <sup>ef</sup> ) | 0.17 $\pm$ 0.01<br>(26.08 $\pm$ 0.35 <sup>de</sup> ) |
|                  | 200 mg/kg,<br>p.o | 0.251 $\pm$ 0.01<br>(7.03 $\pm$ 0.30 <sup>abc</sup> )                                              | 0.22 $\pm$ 0.01<br>(10.08 $\pm$ 0.40 <sup>d</sup> )  | 0.17 $\pm$ 0.04<br>(26.40 $\pm$ 1.76 <sup>e</sup> )   | 0.16 $\pm$ 0.01<br>(30.00 $\pm$ 0.71 <sup>d</sup> )  |
| <b>ANLC</b>      | 50 mg/kg,<br>p.o  | 0.26 $\pm$ 0.01<br>(3.43 $\pm$ 0.41 <sup>cd</sup> )                                                | 0.14 $\pm$ 0.02<br>(41.41 $\pm$ 1.18 <sup>b</sup> )  | 0.12 $\pm$ 0.01<br>(48.05 $\pm$ 7.06 <sup>cd</sup> )  | 0.11 $\pm$ 0.08<br>(52.17 $\pm$ 3.54 <sup>e</sup> )  |
|                  | 100 mg/kg,<br>p.o | 0.25 $\pm$ 0.01<br>(5.60 $\pm$ 0.33 <sup>bc</sup> )                                                | 0.13 $\pm$ 0.08<br>(47.58 $\pm$ 3.29 <sup>ab</sup> ) | 0.11 $\pm$ 0.02<br>(52.38 $\pm$ 3.53 <sup>bc</sup> )  | 0.09 $\pm$ 0.08<br>(60.86 $\pm$ 3.54 <sup>b</sup> )  |
|                  | 200 mg/kg,<br>p.o | 0.24 $\pm$ 0.01<br>(9.25 $\pm$ 0.37 <sup>ab</sup> )                                                | 0.12 $\pm$ 0.03<br>(51.61 $\pm$ 3.29 <sup>a</sup> )  | 0.09 $\pm$ 0.02<br>(60.42 $\pm$ 4.62 <sup>ab</sup> )  | 0.06 $\pm$ 0.01<br>(73.91 $\pm$ 7.09 <sup>a</sup> )  |
| <b>ANLE</b>      | 50 mg/kg,<br>p.o  | 0.26 $\pm$ 0.01<br>(3.54 $\pm$ 0.29 <sup>cd</sup> )                                                | 0.21 $\pm$ 0.03<br>(15.32 $\pm$ 0.23 <sup>cd</sup> ) | 0.18 $\pm$ 0.05<br>(22.07 $\pm$ 0.24 <sup>ef</sup> )  | 0.15 $\pm$ 0.01<br>(30.86 $\pm$ 0.25 <sup>d</sup> )  |
|                  | 100 mg/kg,<br>p.o | 0.25 $\pm$ 0.01<br>(5.50 $\pm$ 0.25 <sup>bc</sup> )                                                | 0.20 $\pm$ 0.08<br>(18.14 $\pm$ 0.32 <sup>cd</sup> ) | 0.17 $\pm$ 0.01<br>(25.54 $\pm$ 0.70 <sup>e</sup> )   | 0.15 $\pm$ 0.02<br>(32.60 $\pm$ 0.90 <sup>d</sup> )  |
|                  | 200 mg/kg,<br>p.o | 0.24 $\pm$ 0.01<br>(9.68 $\pm$ 0.69 <sup>b</sup> )                                                 | 0.19 $\pm$ 0.05<br>(22.98 $\pm$ 0.23 <sup>c</sup> )  | 0.16 $\pm$ 0.02<br>(30.30 $\pm$ 0.24 <sup>d</sup> )   | 0.13 $\pm$ 0.01<br>(40.43 $\pm$ 0.71 <sup>c</sup> )  |

|                                     |                   |                                          |                                          |                                          |                                          |
|-------------------------------------|-------------------|------------------------------------------|------------------------------------------|------------------------------------------|------------------------------------------|
| <b>ANLA</b>                         | 50 mg/kg,<br>p.o  | 0.25±0.08<br>(4.44±0.20 <sup>c</sup> )   | 0.19±0.03<br>(22.17±0.32 <sup>c</sup> )  | 0.13±0.04<br>(40.25±0.70 <sup>cd</sup> ) | 0.12±0.04<br>(45.65±1.77 <sup>c</sup> )  |
|                                     | 100 mg/kg,<br>p.o | 0.25±0.05<br>(5.55±0.21 <sup>bc</sup> )  | 0.18±0.01<br>(25.80±0.61 <sup>c</sup> )  | 0.12±0.03<br>(45.45±1.41 <sup>cd</sup> ) | 0.11±0.03<br>(49.93±1.36 <sup>c</sup> )  |
|                                     | 200 mg/kg,<br>p.o | 0.25±0.01<br>(7.03±0.64 <sup>abc</sup> ) | 0.17±0.01<br>(28.22±0.65 <sup>c</sup> )  | 0.11±0.03<br>(50.40±0.65 <sup>bc</sup> ) | 0.10±0.01<br>(56.52±4.34 <sup>bc</sup> ) |
| <b>Chlorpheniramine<br/>maleate</b> | 25 mg/kg,i.p      | 0.24±0.02<br>(11.11±6.04 <sup>a</sup> )  | 0.13±0.02<br>(47.58±9.87 <sup>ab</sup> ) | 0.09±0.01<br>(61.03±3.53 <sup>a</sup> )  | 0.05±0.01<br>(78.26±3.54 <sup>a</sup> )  |

ANLM; *A. nitida* leaves methanol extract, ANLH; *A. nitida* leaves n-hexane fraction, ANLC; *A. nitida* leaves chloroform fraction, ANLE; *A. nitida* leaves ethyl acetate fraction, ANLA; *A. nitida* leaves aqueous fraction. Values are presented as mean±SD (n=7). Means with different superscript <sup>(a-g)</sup> letters in column are significantly (P < 0.01) different from each other. Percentage inhibition is shown in brackets.

**Table S6.** Effect of *A. nitida* fruit extract and its fractions on histamine induced paw edema in rats

| Treatment        | Dose/route        | Increase in paw volume (ml) after histamine injection (mean $\pm$ SD)/<br>Percent inhibition of edema |                                                      |                                                       |                                                      |
|------------------|-------------------|-------------------------------------------------------------------------------------------------------|------------------------------------------------------|-------------------------------------------------------|------------------------------------------------------|
|                  |                   | +1 h                                                                                                  | +2 h                                                 | +3 h                                                  | +4 h                                                 |
| <b>Histamine</b> | 1 mg/ ml, i.p     | 0.27 $\pm$ 0.01                                                                                       | 0.248 $\pm$ 0.02                                     | 0.231 $\pm$ 0.03                                      | 0.23 $\pm$ 0.04                                      |
| <b>ANFM</b>      | 50 mg/kg, p.o     | 0.25 $\pm$ 0.08<br>(5.04 $\pm$ 0.20 <sup>c</sup> )                                                    | 0.19 $\pm$ 0.03<br>(21.17 $\pm$ 0.32 <sup>c</sup> )  | 0.14 $\pm$ 0.04<br>(40.25 $\pm$ 0.70 <sup>cd</sup> )  | 0.21 $\pm$ 0.04<br>(34.75 $\pm$ 1.77 <sup>c</sup> )  |
|                  | 100 mg/kg,<br>p.o | 0.25 $\pm$ 0.05<br>(5.34 $\pm$ 0.21 <sup>bc</sup> )                                                   | 0.18 $\pm$ 0.01<br>(25.80 $\pm$ 0.61 <sup>c</sup> )  | 0.13 $\pm$ 0.03<br>(44.58 $\pm$ 1.41 <sup>cd</sup> )  | 0.17 $\pm$ 0.03<br>(40.90 $\pm$ 1.36 <sup>c</sup> )  |
|                  | 200 mg/kg,<br>p.o | 0.25 $\pm$ 0.01<br>(7.19 $\pm$ 0.64 <sup>abc</sup> )                                                  | 0.18 $\pm$ 0.01<br>(28.22 $\pm$ 0.65 <sup>c</sup> )  | 0.15 $\pm$ 0.03<br>(39.40 $\pm$ 0.65 <sup>bc</sup> )  | 0.12 $\pm$ 0.01<br>(43.31 $\pm$ 4.34 <sup>bc</sup> ) |
| <b>ANFH</b>      | 50 mg/kg, p.o     | 0.26 $\pm$ 0.03<br>(3.38 $\pm$ 0.19 <sup>d</sup> )                                                    | 0.28 $\pm$ 0.01<br>(3.14 $\pm$ 1.31 <sup>f</sup> )   | 0.18 $\pm$ 0.001<br>(20.84 $\pm$ 0.35 <sup>f</sup> )  | 0.27 $\pm$ 0.01<br>(14.96 $\pm$ 0.66 <sup>e</sup> )  |
|                  | 100 mg/kg,<br>p.o | 0.25 $\pm$ 0.01<br>(5.29 $\pm$ 0.42 <sup>cd</sup> )                                                   | 0.23 $\pm$ 0.01<br>(5.64 $\pm$ 0.23 <sup>ef</sup> )  | 0.18 $\pm$ 0.044<br>(21.07 $\pm$ 1.76 <sup>ef</sup> ) | 0.19 $\pm$ 0.01<br>(23.95 $\pm$ 0.35 <sup>de</sup> ) |
|                  | 200 mg/kg,<br>p.o | 0.246 $\pm$ 0.01<br>(8.67 $\pm$ 0.30 <sup>abc</sup> )                                                 | 0.21 $\pm$ 0.01<br>(12.26 $\pm$ 0.40 <sup>de</sup> ) | 0.26 $\pm$ 0.04<br>(20.33 $\pm$ 1.76 <sup>e</sup> )   | 0.19 $\pm$ 0.01<br>(25.91 $\pm$ 0.71 <sup>d</sup> )  |
| <b>ANFC</b>      | 50 mg/kg, p.o     | 0.25 $\pm$ 0.01<br>(7.19 $\pm$ 0.41 <sup>cd</sup> )                                                   | 0.17 $\pm$ 0.02<br>(38.55 $\pm$ 1.18 <sup>b</sup> )  | 0.19 $\pm$ 0.01<br>(40.95 $\pm$ 7.06 <sup>cd</sup> )  | 0.16 $\pm$ 0.08<br>(44.06 $\pm$ 3.54 <sup>c</sup> )  |
|                  | 100 mg/kg,<br>p.o | 0.24 $\pm$ 0.01<br>(11.42 $\pm$ 0.33 <sup>a</sup> )                                                   | 0.16 $\pm$ 0.08<br>(46.27 $\pm$ 3.29 <sup>ab</sup> ) | 0.19 $\pm$ 0.02<br>(47.28 $\pm$ 3.53 <sup>bc</sup> )  | 0.22 $\pm$ 0.08<br>(50.14 $\pm$ 3.54 <sup>b</sup> )  |
|                  | 200 mg/kg,<br>p.o | 0.23 $\pm$ 0.01<br>(12.48 $\pm$ 0.37 <sup>a</sup> )                                                   | 0.14 $\pm$ 0.03<br>(48.30 $\pm$ 3.29 <sup>a</sup> )  | 0.10 $\pm$ 0.02<br>(53.56 $\pm$ 4.62 <sup>ab</sup> )  | 0.13 $\pm$ 0.01<br>(64.56 $\pm$ 3.09 <sup>a</sup> )  |
| <b>ANFE</b>      | 50 mg/kg, p.o     | 0.27 $\pm$ 0.01<br>(3.54 $\pm$ 0.29 <sup>d</sup> )                                                    | 0.22 $\pm$ 0.03<br>(14.32 $\pm$ 0.23 <sup>cd</sup> ) | 0.18 $\pm$ 0.05<br>(22.07 $\pm$ 0.24 <sup>ef</sup> )  | 0.18 $\pm$ 0.01<br>(28.86 $\pm$ 0.25 <sup>d</sup> )  |
|                  | 100 mg/kg,<br>p.o | 0.25 $\pm$ 0.01<br>(6.50 $\pm$ 0.25 <sup>bc</sup> )                                                   | 0.19 $\pm$ 0.08<br>(19.14 $\pm$ 0.32 <sup>cd</sup> ) | 0.17 $\pm$ 0.01<br>(25.54 $\pm$ 0.70 <sup>e</sup> )   | 0.15 $\pm$ 0.02<br>(31.60 $\pm$ 0.90 <sup>d</sup> )  |
|                  | 200 mg/kg,<br>p.o | 0.19 $\pm$ 0.01<br>(10.68 $\pm$ 0.69 <sup>b</sup> )                                                   | 0.20 $\pm$ 0.05<br>(21.98 $\pm$ 0.23 <sup>cd</sup> ) | 0.16 $\pm$ 0.02<br>(30.30 $\pm$ 0.24 <sup>d</sup> )   | 0.18 $\pm$ 0.01<br>(38.43 $\pm$ 0.71 <sup>c</sup> )  |
| <b>ANFA</b>      | 50 mg/kg, p.o     | 0.19 $\pm$ 0.01<br>(7.82 $\pm$ 3.02 <sup>cd</sup> )                                                   | 0.19 $\pm$ 0.01<br>(23.38 $\pm$ 5.20 <sup>cd</sup> ) | 0.19 $\pm$ 0.01<br>(40.66 $\pm$ 0.52 <sup>d</sup> )   | 0.17 $\pm$ 0.08<br>(42.82 $\pm$ 3.54 <sup>c</sup> )  |

|                                 |                   |                                         |                                          |                                          |                                         |
|---------------------------------|-------------------|-----------------------------------------|------------------------------------------|------------------------------------------|-----------------------------------------|
|                                 | 100 mg/kg,<br>p.o | 0.24±0.02<br>(9.52±0.60 <sup>c</sup> )  | 0.18±0.02<br>(27.41±1.06 <sup>c</sup> )  | 0.15±0.01<br>(45.05±7.06 <sup>cd</sup> ) | 0.22±0.08<br>(44.17±3.54 <sup>c</sup> ) |
|                                 | 200 mg/kg,<br>p.o | 0.25±0.01<br>(9.91±0.30 <sup>c</sup> )  | 0.17±0.02<br>(31.45±0.83 <sup>c</sup> )  | 0.11±0.08<br>(52.38±3.53 <sup>bc</sup> ) | 0.19±0.01<br>(58.21±5.61 <sup>b</sup> ) |
| <b>Chlorpheniramine maleate</b> | 25 mg/kg,i.p      | 0.24±0.02<br>(11.11±6.04 <sup>a</sup> ) | 0.13±0.02<br>(47.58±9.87 <sup>ab</sup> ) | 0.09±0.01<br>(61.03±3.53 <sup>a</sup> )  | 0.05±0.01<br>(78.26±3.54 <sup>a</sup> ) |

ANFM; *A. nitida* fruit methanol extract, ANFH; *A. nitida* fruit n-hexane fraction, ANFC; *A. nitida* fruit chloroform fraction, ANFE; *A. nitida* fruit ethyl acetate fraction, ANFA; *A. nitida* fruit aqueous fraction. Values are presented as mean±SD (n=7). Means with different superscript <sup>(a-d)</sup> letters in column are significantly (P < 0.01) different from each other. Percentage inhibition is shown in brackets.

**Table S7.** Effect of *A. nitida* leaves and its fractions on xylene induced ear edema in rats

| Treatment               | Dose/route     | Mean increase in ear weight<br>(mg) (mean $\pm$ SD) | Percent inhibition             |
|-------------------------|----------------|-----------------------------------------------------|--------------------------------|
| Saline                  | 2 ml, i.p      | 13.97 $\pm$ 0.01                                    | 0                              |
| ANLM                    | 50 mg/kg, p.o  | 8.70 $\pm$ 0.08                                     | 37.70 $\pm$ 0.58 <sup>f</sup>  |
|                         | 100 mg/kg, p.o | 7.63 $\pm$ 0.74                                     | 43.48 $\pm$ 1.97 <sup>e</sup>  |
|                         | 200 mg/kg, p.o | 5.91 $\pm$ 0.03                                     | 57.66 $\pm$ 0.22 <sup>d</sup>  |
| ANLH                    | 50 mg/kg, p.o  | 13.11 $\pm$ 0.01                                    | 6.22 $\pm$ 0.09 <sup>h</sup>   |
|                         | 100 mg/kg, p.o | 12.23 $\pm$ 0.05                                    | 12.51 $\pm$ 0.36 <sup>g</sup>  |
|                         | 200 mg/kg, p.o | 10.90 $\pm$ 0.03                                    | 21.97 $\pm$ 0.25 <sup>g</sup>  |
| ANLC                    | 50 mg/kg, p.o  | 6.20 $\pm$ 0.03                                     | 55.58 $\pm$ 0.25 <sup>e</sup>  |
|                         | 100 mg/kg, p.o | 4.21 $\pm$ 0.02                                     | 69.87 $\pm$ 0.19 <sup>c</sup>  |
|                         | 200 mg/kg, p.o | 2.89 $\pm$ 0.08                                     | 79.32 $\pm$ 0.58 <sup>b</sup>  |
| ANLE                    | 50 mg/kg, p.o  | 9.64 $\pm$ 0.10                                     | 31.04 $\pm$ 0.77 <sup>e</sup>  |
|                         | 100 mg/kg, p.o | 8.21 $\pm$ 0.05                                     | 41.22 $\pm$ 0.38 <sup>c</sup>  |
|                         | 200 mg/kg, p.o | 7.05 $\pm$ 0.68                                     | 49.51 $\pm$ 4.88 <sup>b</sup>  |
| ANLA                    | 50 mg/kg, p.o  | 9.09 $\pm$ 0.16                                     | 34.92 $\pm$ 1.19 <sup>de</sup> |
|                         | 100 mg/kg, p.o | 8.11 $\pm$ 0.01                                     | 41.98 $\pm$ 0.05 <sup>c</sup>  |
|                         | 200 mg/kg, p.o | 6.75 $\pm$ 0.57                                     | 51.68 $\pm$ 4.13 <sup>b</sup>  |
| Diclofenac<br>potassium | 10 mg/kg,i.p   | 2.61 $\pm$ 0.02                                     | 81.32 $\pm$ 0.15 <sup>a</sup>  |
| Fluoxetine              | 10 mg/kg,i.p   | 2.35 $\pm$ 0.04                                     | 85.31 $\pm$ 0.04 <sup>a</sup>  |

ANLM; *A. nitida* leaves methanol extract, ANLH; *A. nitida* leaves n-hexane fraction, ANLC; *A. nitida* leaves chloroform fraction, ANLE; *A. nitida* leaves ethyl acetate fraction, ANLA; *A. nitida* leaves aqueous fraction. Values are presented as mean $\pm$ SD (n=7). Means with different superscript <sup>(a-g)</sup> letters in column are significantly (P <0.01) different from each other.

**Table S8.** Effect of *A. nitida* fruit and its fractions on xylene induced ear edema in rats

| Treatment  | Dose/route    | Mean increase in ear weight<br>(mg)<br>(mean $\pm$ SD) | Percent inhibition              |
|------------|---------------|--------------------------------------------------------|---------------------------------|
| Saline     | 2 ml, i.p     | 13.97 $\pm$ 0.01                                       | 0                               |
| ANFM       | 50 mg/kg, p.o | 9.68 $\pm$ 1.15                                        | 30.73 $\pm$ 8.28 <sup>ef</sup>  |
|            | 100 mg/kg,    | 8.39 $\pm$ 0.48                                        | 39.96 $\pm$ 3.50 <sup>e</sup>   |
|            | 200 mg/kg,    | 5.37 $\pm$ 1.19                                        | 61.54 $\pm$ 8.54 <sup>cd</sup>  |
| ANFH       | 50 mg/kg, p.o | 12.87 $\pm$ 0.89                                       | 7.91 $\pm$ 6.40 <sup>h</sup>    |
|            | 100 mg/kg,    | 11.92 $\pm$ 0.80                                       | 14.68 $\pm$ 5.74 <sup>gh</sup>  |
|            | 200 mg/kg,    | 10.46 $\pm$ 0.75                                       | 25.12 $\pm$ 5.37 <sup>fg</sup>  |
| ANFC       | 50 mg/kg, p.o | 6.69 $\pm$ 0.96                                        | 52.08 $\pm$ 6.89 <sup>d</sup>   |
|            | 100 mg/kg,    | 4.54 $\pm$ 0.59                                        | 67.52 $\pm$ 4.28 <sup>bc</sup>  |
|            | 200 mg/kg,    | 3.43 $\pm$ 0.53                                        | 75.42 $\pm$ 3.84 <sup>ab</sup>  |
| ANFE       | 50 mg/kg, p.o | 9.87 $\pm$ 0.64                                        | 29.33 $\pm$ 4.58 <sup>d</sup>   |
|            | 100 mg/kg,    | 8.62 $\pm$ 0.77                                        | 38.33 $\pm$ 5.53 <sup>cd</sup>  |
|            | 200 mg/kg,    | 7.64 $\pm$ 1.25                                        | 45.30 $\pm$ 8.95 <sup>c</sup>   |
| ANFA       | 50 mg/kg, p.o | 9.06 $\pm$ 0.65                                        | 35.15 $\pm$ 4.71 <sup>cd</sup>  |
|            | 100 mg/kg,    | 8.45 $\pm$ 1.41                                        | 39.49 $\pm$ 10.10 <sup>cd</sup> |
|            | 200 mg/kg,    | 5.71 $\pm$ 0.66                                        | 59.11 $\pm$ 4.78 <sup>b</sup>   |
| Diclofenac | 10 mg/kg,i.p  | 2.61 $\pm$ 0.02                                        | 81.32 $\pm$ 0.15 <sup>a</sup>   |
| Fluoxetine | 10 mg/kg,i.p  | 2.35 $\pm$ 0.04                                        | 85.31 $\pm$ 0.04 <sup>a</sup>   |

ANFM; *A. nitida* fruit methanol extract, ANFH; *A. nitida* fruit n-hexane fraction, ANFC; *A. nitida* fruit chloroform fraction, ANFE; *A. nitida* fruit ethyl acetate fraction, ANFA; *A. nitida* fruit aqueous fraction. Values are presented as mean $\pm$ SD (n=7). Means with different superscript (a-d) letters in column are significantly (P < 0.01) different from each other.

**Table S9.** Effect of *A. nitida* leaves and its fractions on hot plate test in rats

| Group  | Dose/route     | Latency time in seconds/percentage analgesic activity |                                           |                                           |                                           |
|--------|----------------|-------------------------------------------------------|-------------------------------------------|-------------------------------------------|-------------------------------------------|
|        |                | 0 min                                                 | 30 min                                    | 60 min                                    | 120 min                                   |
| Saline | 2 ml, i.p      | 7.07±0.19                                             | 7.03±0.08                                 | 7.01±0.12                                 | 6.76±0.20                                 |
| ANLM   | 50 mg/kg,p.o.  | 7.07±0.16<br>(3.21±0.80 <sup>a</sup> )                | 14.14±0.38<br>(38.56±1.89 <sup>b</sup> )  | 14.86±1.14<br>(41.44±5.72 <sup>b</sup> )  | 15.39±0.48<br>(43.38±2.42 <sup>b</sup> )  |
|        | 100 mg/kg,p.o. | 7.06±0.15<br>(3.14±0.76 <sup>a</sup> )                | 14.86±0.38<br>(42.14±1.89 <sup>b</sup> )  | 15.71±0.49<br>(45.72±2.44 <sup>b</sup> )  | 16.94±0.75<br>(51.16±3.73 <sup>b</sup> )  |
|        | 200 mg/kg,p.o. | 7.04±0.11<br>(3.06±0.57 <sup>a</sup> )                | 17.29±0.49<br>(54.28±2.44 <sup>b</sup> )  | 17.79±0.70<br>(56.08±3.49 <sup>b</sup> )  | 18.14±0.69<br>(57.16±3.45 <sup>b</sup> )  |
| ANLH   | 50 mg/kg,p.o.  | 7.09±0.23<br>(3.28±1.13 <sup>a</sup> )                | 7.43±0.53<br>(4.99±2.67 <sup>d</sup> )    | 9.86±0.40<br>(16.29±1.86 <sup>c</sup> )   | 10.06±0.10<br>(16.69±0.42 <sup>c</sup> )  |
|        | 100 mg/kg,p.o. | 7.09±0.38<br>(3.28±1.90 <sup>a</sup> )                | 10.07±0.13<br>(18.21±0.63 <sup>c</sup> )  | 10.39±0.36<br>(19.08±1.81 <sup>d</sup> )  | 10.97±0.08<br>(21.31±0.38 <sup>c</sup> )  |
|        | 200 mg/kg,p.o. | 7.04±0.45<br>(3.06±2.23 <sup>a</sup> )                | 10.43±0.53<br>(19.99±2.67 <sup>d</sup> )  | 10.71±0.49<br>(20.72±2.44 <sup>d</sup> )  | 11.29±0.49<br>(22.88±2.44 <sup>d</sup> )  |
| ANLC   | 50 mg/kg,p.o.  | 7.03±0.22<br>(2.99±1.11 <sup>a</sup> )                | 17.29±0.49<br>(54.28±2.44 <sup>a</sup> )  | 18.04±0.31<br>(57.36±1.55 <sup>a</sup> )  | 18.61±0.45<br>(59.52±2.24 <sup>a</sup> )  |
|        | 100 mg/kg,p.o. | 7.16±0.23<br>(3.64±1.15 <sup>a</sup> )                | 18.31±0.42<br>(59.42±2.09 <sup>b</sup> )  | 18.96±0.11<br>(61.94±0.57 <sup>a</sup> )  | 19.31±0.29<br>(63.02±1.43 <sup>a</sup> )  |
|        | 200 mg/kg,p.o. | 7.09±0.15<br>(3.28±0.73 <sup>a</sup> )                | 18.51±0.65<br>(60.42±3.26 <sup>a</sup> )  | 19.27±0.31<br>(63.51±1.57 <sup>a</sup> )  | 19.74±0.36<br>(65.16±1.80 <sup>a</sup> )  |
| ANLE   | 50 mg/kg,p.o.  | 7.01±0.35<br>(3.14±1.85 <sup>a</sup> )                | 13.64±0.63<br>(36.06±3.13 <sup>b</sup> )  | 14.19±0.63<br>(38.08±3.17 <sup>b</sup> )  | 15.21±0.39<br>(42.52±1.97 <sup>b</sup> )  |
|        | 100 mg/kg,p.o. | 7.03±0.35<br>(2.99±1.75 <sup>a</sup> )                | 14.79±0.27<br>(41.78±1.37 <sup>b</sup> )  | 15.16±0.27<br>(42.94±1.35 <sup>bc</sup> ) | 16.31±0.39<br>(48.02±1.97 <sup>b</sup> )  |
|        | 200 mg/kg,p.o. | 7.01±0.16<br>(2.92±0.79 <sup>a</sup> )                | 16.57±0.53<br>(50.71±2.67 <sup>bc</sup> ) | 17.33±0.42<br>(53.79±2.10 <sup>b</sup> )  | 17.77±0.18<br>(55.31±0.90 <sup>bc</sup> ) |
| ANLA   | 50 mg/kg,p.o.  | 7.07±0.19<br>(3.21±0.94 <sup>a</sup> )                | 12.57±0.53<br>(30.71±2.67 <sup>c</sup> )  | 14.60±0.46<br>(40.15±2.31 <sup>b</sup> )  | 14.93±0.64<br>(41.09±3.20 <sup>b</sup> )  |
|        | 100 mg/kg,p.o. | 7.00±0.32                                             | 14.60±0.32                                | 14.90±0.13                                | 16.20±0.22                                |

|                 |                       |                                        |                                          |                                          |                                          |
|-----------------|-----------------------|----------------------------------------|------------------------------------------|------------------------------------------|------------------------------------------|
|                 |                       | (2.85±1.61 <sup>a</sup> )              | (40.85±1.58 <sup>b</sup> )               | (41.65±0.65 <sup>c</sup> )               | (47.45±1.08 <sup>b</sup> )               |
|                 | <b>200 mg/kg,p.o.</b> | 7.06±0.20<br>(3.14±0.99 <sup>a</sup> ) | 15.94±0.10<br>(47.56±0.49 <sup>c</sup> ) | 16.37±0.36<br>(49.01±1.80 <sup>c</sup> ) | 17.17±0.37<br>(52.31±1.86 <sup>c</sup> ) |
| <b>Morphine</b> | <b>(10 mg/kg)</b>     | 7.07±0.13<br>(3.21±0.63 <sup>a</sup> ) | 18.0±0.58<br>(57.85±2.89 <sup>a</sup> )  | 18.43±0.53<br>(63.29±2.67 <sup>a</sup> ) | 18.57±0.53<br>(69.31±2.67 <sup>a</sup> ) |
| <b>Aspirin</b>  | <b>(10 mg/kg)</b>     | 7.10±0.19<br>(3.35±0.96 <sup>a</sup> ) | 19.29±0.49<br>(64.28±2.44 <sup>a</sup> ) | 19.71±0.37<br>(65.72±1.84 <sup>a</sup> ) | 20.16±0.42<br>(67.24±2.08 <sup>a</sup> ) |

ANLM; *A. nitida* leaves methanol extract, ANLH; *A. nitida* leaves n-hexane fraction, ANLC; *A. nitida* leaves chloroform fraction, ANLE; *A. nitida* leaves ethyl acetate fraction, ANLA; *A. nitida* leaves aqueous fraction. Values are presented as mean±SD (n=7). Means with different superscript (<sup>a-g</sup>) letters in column are significantly (P < 0.01) different from each other. Percentage analgesic activity is shown in brackets.



**Table S10.** Effect of *A. nitida* fruit extract and its fractions on hot plate test in rats

| Group  | Dose/route     | Latency time in seconds/percentage analgesic activity |                                          |                                           |                                           |
|--------|----------------|-------------------------------------------------------|------------------------------------------|-------------------------------------------|-------------------------------------------|
|        |                | 0 min                                                 | 30 min                                   | 60 min                                    | 120 min                                   |
| Saline | 2 ml, i.p      | 7.07±0.19                                             | 7.03±0.08                                | 7.01±0.12                                 | 6.76±0.20                                 |
| ANFM   | 50 mg/kg,p.o.  | 7.07±0.16<br>(3.21±0.80 <sup>a</sup> )                | 14.43±0.53<br>(39.99±2.67 <sup>c</sup> ) | 16.14±0.90<br>(47.86±4.50 <sup>c</sup> )  | 16.69±0.47<br>(49.88±2.37 <sup>c</sup> )  |
|        | 100 mg/kg,p.o. | 7.04±0.16<br>(3.06±0.81 <sup>ab</sup> )               | 15.71±0.49<br>(46.42±2.44 <sup>b</sup> ) | 16.74±0.73<br>(50.86±3.64 <sup>b</sup> )  | 17.37±0.48<br>(53.31±2.41 <sup>b</sup> )  |
|        | 200 mg/kg,p.o. | 6.97±0.19<br>(2.71±0.94 <sup>a</sup> )                | 16.11±0.30<br>(48.42±1.51 <sup>b</sup> ) | 17.29±0.49<br>(53.58±2.44 <sup>b</sup> )  | 17.86±0.90<br>(55.74±4.50 <sup>cd</sup> ) |
| ANFH   | 50 mg/kg,p.o.  | 6.66±0.19<br>(1.14±0.95 <sup>b</sup> )                | 7.33±0.53<br>(4.49±2.66 <sup>e</sup> )   | 9.43±0.53<br>(14.29±2.67 <sup>e</sup> )   | 10.06±0.10<br>(16.69±0.42 <sup>e</sup> )  |
|        | 100 mg/kg,p.o. | 6.64±0.18<br>(1.06±0.91 <sup>c</sup> )                | 9.43±0.53<br>(14.99±2.67 <sup>d</sup> )  | 10.10±0.17<br>(17.65±0.87 <sup>d</sup> )  | 10.57±0.53<br>(19.31±2.67 <sup>d</sup> )  |
|        | 200 mg/kg,p.o. | 6.89±0.20<br>(2.28±0.98 <sup>a</sup> )                | 10.14±0.38<br>(18.56±1.89 <sup>d</sup> ) | 10.86±1.07<br>(21.44±5.35 <sup>d</sup> )  | 11.47±0.77<br>(23.81±3.84 <sup>e</sup> )  |
| ANFC   | 50 mg/kg,p.o.  | 6.91±0.12<br>(2.42±0.61 <sup>ab</sup> )               | 16.29±0.49<br>(49.28±2.44 <sup>b</sup> ) | 17.44±0.50<br>(54.36±2.48 <sup>ab</sup> ) | 18.10±0.64<br>(56.95±3.18 <sup>ab</sup> ) |
|        | 100 mg/kg,p.o. | 6.97±0.13<br>(2.71±0.63 <sup>abc</sup> )              | 16.71±0.76<br>(51.42±3.78 <sup>b</sup> ) | 17.94±0.15<br>(56.86±0.76 <sup>a</sup> )  | 18.61±0.63<br>(59.52±3.17 <sup>a</sup> )  |
|        | 200 mg/kg,p.o. | 7.04±0.19<br>(3.06±0.95 <sup>a</sup> )                | 16.89±0.68<br>(52.28±4.16 <sup>b</sup> ) | 18.40±0.40<br>(59.15±2.31 <sup>b</sup> )  | 19.17±0.37<br>(62.31±1.86 <sup>ab</sup> ) |
| ANFE   | 50 mg/kg,p.o.  | 6.77±0.17<br>(1.99±0.85 <sup>ab</sup> )               | 13.43±0.53<br>(34.99±2.67 <sup>d</sup> ) | 13.87±0.39<br>(36.51±1.93 <sup>d</sup> )  | 14.60±0.50<br>(39.45±2.52 <sup>d</sup> )  |
|        | 100 mg/kg,p.o. | 6.77±0.20<br>(1.71±0.99 <sup>abc</sup> )              | 13.64±0.27<br>(36.06±4.02 <sup>c</sup> ) | 14.57±0.53<br>(40.01±2.67 <sup>c</sup> )  | 16.07±0.13<br>(46.81±0.63 <sup>c</sup> )  |
|        | 200 mg/kg,p.o. | 6.90±0.16<br>(2.35±0.82 <sup>a</sup> )                | 14.43±0.98<br>(39.99±4.88 <sup>c</sup> ) | 15.29±0.76<br>(43.58±3.78 <sup>c</sup> )  | 16.70±0.83<br>(49.95±4.16 <sup>d</sup> )  |
| ANFA   | 50 mg/kg,p.o.  | 7.09±0.23<br>(3.28±1.13 <sup>a</sup> )                | 15.26±0.64<br>(44.14±2.21 <sup>c</sup> ) | 16.57±0.53<br>(50.01±2.67 <sup>bc</sup> ) | 17.34±0.44<br>(53.16±2.21 <sup>bc</sup> ) |
|        | 100 mg/kg,p.o. | 6.71±0.20                                             | 16.14±0.69                               | 17.00±0.58                                | 17.71±0.71                                |

|                 |                       |                                        |                                          |                                          |                                           |
|-----------------|-----------------------|----------------------------------------|------------------------------------------|------------------------------------------|-------------------------------------------|
|                 |                       | (1.42±0.98 <sup>bc</sup> )             | (48.56±3.45 <sup>b</sup> )               | (52.15±2.89 <sup>b</sup> )               | (55.02±3.54 <sup>ab</sup> )               |
|                 | <b>200 mg/kg,p.o.</b> | 6.87±0.20<br>(2.21±0.99 <sup>a</sup> ) | 16.24±0.52<br>(49.06±2.61 <sup>b</sup> ) | 17.50±0.87<br>(54.65±4.33 <sup>b</sup> ) | 18.43±0.53<br>(58.59±2.67 <sup>bc</sup> ) |
| <b>Morphine</b> | <b>(10 mg/kg)</b>     | 7.07±0.13<br>(3.21±0.63 <sup>a</sup> ) | 18.0±0.58<br>(57.85±2.89 <sup>a</sup> )  | 18.43±0.53<br>(63.29±2.67 <sup>a</sup> ) | 18.57±0.53<br>(69.31±2.67 <sup>a</sup> )  |
| <b>Aspirin</b>  | <b>(10 mg/kg)</b>     | 7.10±0.19<br>(3.35±0.96 <sup>a</sup> ) | 19.29±0.49<br>(64.28±2.44 <sup>a</sup> ) | 19.71±0.37<br>(65.72±1.84 <sup>a</sup> ) | 20.16±0.42<br>(67.24±2.08 <sup>a</sup> )  |

ANFM; *A. nitida* fruit methanol extract, ANFH; *A. nitida* fruit n-hexane fraction, ANFC; *A. nitida* fruit chloroform fraction, ANFE; *A. nitida* fruit ethyl acetate fraction, ANFA; *A. nitida* fruit aqueous fraction. Values are presented as mean±SD (n=7). Means with different superscript (a-d) letters in column are significantly (P < 0.01) different from each other. Percentage analgesic activity is shown in brackets.

**Table S11.** Effect of *A. nitida* leaves extract and its fractions on acetic acid induced writhing in rats

| Groups   | Dose/route     | No. of writhing (mean $\pm$ SD) | % inhibition                   |
|----------|----------------|---------------------------------|--------------------------------|
| Saline   | 10 ml, i.p.    | 71.33 $\pm$ 3.21                | 0                              |
| ANLM     | 50 mg/kg,p.o.  | 28.02 $\pm$ 1.11                | 60.21 $\pm$ 2.33 <sup>ab</sup> |
|          | 100 mg/kg,p.o. | 25.01 $\pm$ 1.17                | 64.47 $\pm$ 2.17 <sup>ab</sup> |
|          | 200 mg/kg,p.o. | 22.00 $\pm$ 2.30                | 68.74 $\pm$ 3.28 <sup>a</sup>  |
| ANLH     | 50 mg/kg,p.o.  | 62.05 $\pm$ 3.41                | 11.90 $\pm$ 1.05 <sup>f</sup>  |
|          | 100 mg/kg,p.o. | 58.04 $\pm$ 2.33                | 17.59 $\pm$ 1.43 <sup>f</sup>  |
|          | 200 mg/kg,p.o. | 52.28 $\pm$ 3.14                | 27.70 $\pm$ 4.47 <sup>e</sup>  |
| ANLC     | 50 mg/kg,p.o.  | 21.00 $\pm$ 1.61                | 70.16 $\pm$ 2.99 <sup>a</sup>  |
|          | 100 mg/kg,p.o. | 15.22 $\pm$ 1.14                | 78.68 $\pm$ 3.21 <sup>a</sup>  |
|          | 200 mg/kg,p.o. | 12.93 $\pm$ 0.04                | 81.62 $\pm$ 0.06 <sup>a</sup>  |
| ANLE     | 50 mg/kg,p.o.  | 49.00 $\pm$ 2.33                | 30.37 $\pm$ 2.22 <sup>de</sup> |
|          | 100 mg/kg,p.o. | 45.01 $\pm$ 2.92                | 36.06 $\pm$ 1.45 <sup>d</sup>  |
|          | 200 mg/kg,p.o. | 42.29 $\pm$ 0.29                | 39.90 $\pm$ 0.41 <sup>d</sup>  |
| ANLA     | 50 mg/kg,p.o.  | 33.01 $\pm$ 1.77                | 53.11 $\pm$ 3.35 <sup>c</sup>  |
|          | 100 mg/kg,p.o. | 29.03 $\pm$ 1.08                | 58.79 $\pm$ 3.11 <sup>bc</sup> |
|          | 200 mg/kg,p.o. | 25.57 $\pm$ 2.14                | 62.24 $\pm$ 3.05 <sup>ab</sup> |
| Aspirin  | 10 mg/kg,i.p.  | 20.13 $\pm$ 1.12                | 71.39 $\pm$ 2.00 <sup>a</sup>  |
| Morphine | 10 mg/kg,i.p.  | 13.22 $\pm$ 1.89                | 81.65 $\pm$ 2.14 <sup>a</sup>  |

ANLM; *A. nitida* leaves methanol extract, ANLH; *A. nitida* leaves n-hexane fraction, ANLC; *A. nitida* leaves chloroform fraction, ANLE; *A. nitida* leaves ethyl acetate fraction, ANLA; *A. nitida* leaves aqueous fraction. Values are presented as mean $\pm$ SD (n=7). Means with different superscript (<sup>a-g</sup>) letters in column are significantly (P < 0.01) different from each other. Percentage analgesic activity is shown in brackets.

**Table S12.** Effect of *A. nitida* fruit extract and its fractions on acetic acid induced writhing in rats

| Groups   | Dose/route     | No. of writhing (mean $\pm$ SD) | % inhibition                   |
|----------|----------------|---------------------------------|--------------------------------|
| Saline   | 10 ml, i.p.    | 71.33 $\pm$ 3.21                | 0                              |
| ANFM     | 50 mg/kg,p.o.  | 38.01 $\pm$ 0.27                | 50.11 $\pm$ 3.35 <sup>cd</sup> |
|          | 100 mg/kg,p.o. | 35.03 $\pm$ 1.08                | 53.79 $\pm$ 2.11 <sup>cd</sup> |
|          | 200 mg/kg,p.o. | 31.57 $\pm$ 2.24                | 58.24 $\pm$ 3.05 <sup>b</sup>  |
| ANFH     | 50 mg/kg,p.o.  | 63.01 $\pm$ 3.11                | 10.20 $\pm$ 1.25 <sup>f</sup>  |
|          | 100 mg/kg,p.o. | 57.04 $\pm$ 2.33                | 18.99 $\pm$ 1.43 <sup>f</sup>  |
|          | 200 mg/kg,p.o. | 57.28 $\pm$ 3.19                | 24.70 $\pm$ 4.47 <sup>e</sup>  |
| ANFC     | 50 mg/kg,p.o.  | 28.00 $\pm$ 0.61                | 65.16 $\pm$ 2.99 <sup>a</sup>  |
|          | 100 mg/kg,p.o. | 23.22 $\pm$ 1.24                | 72.68 $\pm$ 2.21 <sup>a</sup>  |
|          | 200 mg/kg,p.o. | 16.93 $\pm$ 0.14                | 75.62 $\pm$ 2.06 <sup>a</sup>  |
| ANFE     | 50 mg/kg,p.o.  | 48.00 $\pm$ 2.33                | 30.37 $\pm$ 2.22 <sup>de</sup> |
|          | 100 mg/kg,p.o. | 46.01 $\pm$ 1.92                | 35.06 $\pm$ 1.05 <sup>d</sup>  |
|          | 200 mg/kg,p.o. | 41.29 $\pm$ 1.29                | 39.90 $\pm$ 0.41 <sup>d</sup>  |
| ANFA     | 50 mg/kg,p.o.  | 32.02 $\pm$ 1.21                | 55.21 $\pm$ 2.40 <sup>bc</sup> |
|          | 100 mg/kg,p.o. | 30.01 $\pm$ 1.18                | 60.47 $\pm$ 2.20 <sup>ab</sup> |
|          | 200 mg/kg,p.o. | 28.00 $\pm$ 2.50                | 64.74 $\pm$ 3.18 <sup>ab</sup> |
| Aspirin  | 10 mg/kg,i.p.  | 20.13 $\pm$ 1.12                | 71.39 $\pm$ 2.00 <sup>a</sup>  |
| Morphine | 10 mg/kg,i.p.  | 13.22 $\pm$ 1.89                | 81.65 $\pm$ 2.14 <sup>a</sup>  |

ANFM; *A. nitida* fruit methanol extract, ANFH; *A. nitida* fruit n-hexane fraction, ANFC; *A. nitida* fruit chloroform fraction, ANFE; *A. nitida* fruit ethyl acetate fraction, ANFA; *A. nitida* fruit aqueous fraction. Values are presented as mean $\pm$ SD (n=7). Means with different superscript (a-d) letters in column are significantly (P < 0.01) different from each other. Percentage analgesic activity is shown in brackets.
